# Supplementary material
Source: PubMed Central journal article supplement (PMC6644479)
Supplement: ao8b01794_si_001.pdf [file ao8b01794_si_001.pdf]

Supporting Information

For

**One-Pot Magnetic Iron Oxide-Carbon Nanodots Composite  
Catalyzed Cyclooxidative Aqueous Tandem Synthesis of  
Quinazolinones in Presence of Tert-butyl Hydroperoxide**

Biju Majumdar,<sup>‡</sup> Daisy Sarma,<sup>‡</sup> Siddarth Jain<sup>‡</sup> and Tridib K. Sarma<sup>+\*</sup>

<sup>‡</sup>Discipline of Chemistry, Indian Institute of Technology Indore, Simrol, Khandwa Road,  
Madhya Pradesh-453552

Corresponding Author E-mail: [tridib@iiti.ac.in](mailto:tridib@iiti.ac.in)

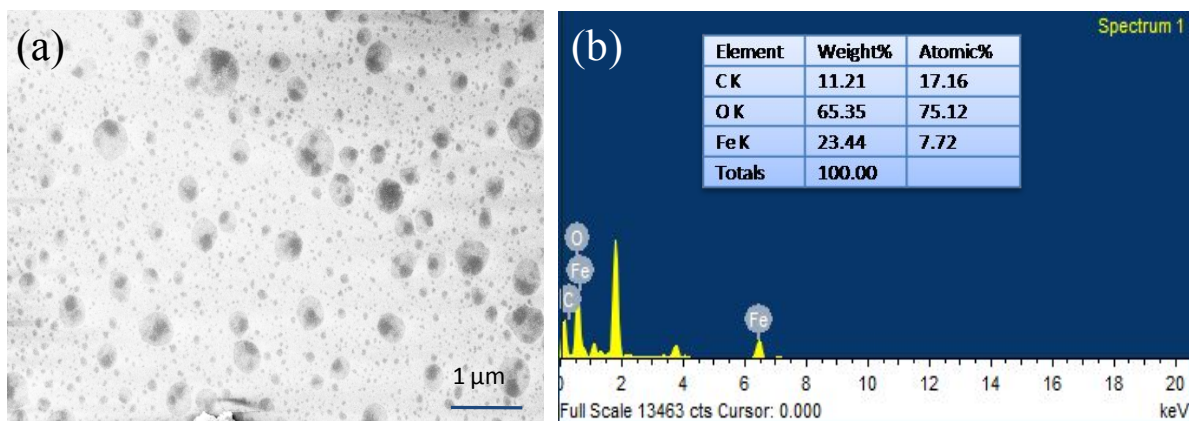

**Figure S1:** a) SEM image and b) EDS spectrum of Fe<sub>3</sub>O<sub>4</sub>-CND composite

**Table S1. Oxidative coupling of (1a) and (2a) under various conditions<sup>a</sup>**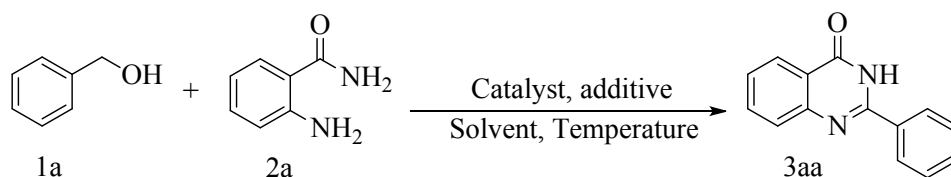

| entry | catalyst (wt%)                           | solvent            | oxidant (eq.)                      | temp. (°C) | yield <sup>b</sup> (%) |
|-------|------------------------------------------|--------------------|------------------------------------|------------|------------------------|
| 1     | Fe <sub>3</sub> O <sub>4</sub> -CND (10) | H <sub>2</sub> O   | -                                  | 50         | trace                  |
| 2     | Fe <sub>3</sub> O <sub>4</sub> -CND (5)  | H <sub>2</sub> O   | TBHP (2)                           | 90         | 65                     |
| 3     | Fe <sub>3</sub> O <sub>4</sub> -CND (15) | H <sub>2</sub> O   | TBHP (2)                           | 90         | 91                     |
| 4     | Fe <sub>3</sub> O <sub>4</sub> -CND (10) | CH <sub>3</sub> CN | TBHP (2)                           | 90         | 46                     |
| 5     | Fe <sub>3</sub> O <sub>4</sub> -CND (10) | H <sub>2</sub> O   | TBHP (4)                           | 90         | 64                     |
| 6     | Fe <sub>3</sub> O <sub>4</sub> -CND (10) | H <sub>2</sub> O   | K <sub>2</sub> CO <sub>3</sub> (2) | 90         | trace                  |

<sup>a</sup>Reaction conditions: 1a (1.5 mmol), 2a (0.5 mmol), catalyst 5-15 wt%, oxidants 1-4 equiv. and solvent 2mL, 16 hr, <sup>b</sup> yields of isolated product

### Characterization data of quinazolinones

**2-phenylquinazolin-4(3H)-one (3aa)<sup>1</sup>:** Colourless solid, m.p. 231-233 °C; <sup>1</sup>H NMR (CDCl<sub>3</sub>, 400 MHz): δ = 11.28 (br, s, 1H), 8.33-8.31 (m, 1H), 8.23-8.20 (m, 2H), 7.84-7.78 (m, 2H), 7.60-7.56 (m, 3H), 7.52-7.48 (m, 1H); <sup>13</sup>C NMR (CDCl<sub>3</sub>, 100 MHz): δ = 163.6, 151.6, 149.4, 134.8, 132.8, 131.6, 129.0, 128.0, 127.2, 126.8, 126.3, 120.8; HRMS (ESI): calcd for [C<sub>14</sub>H<sub>10</sub>N<sub>2</sub>O<sup>++</sup> Na<sup>+</sup>] 245.0685, found 245.0691.

**2-(4-chlorophenyl)quinazolin-4(3H)-one (3ba)<sup>2</sup>:** Colourless solid, m.p. >300 °C; <sup>1</sup>H NMR (DMSO-d<sub>6</sub>, 400 MHz): δ = 12.59 (br, s, 1H), 8.18 (d, *J*=8.56 Hz, 2H), 8.14 (d, *J*=7.56 Hz, 1H), 7.84 (t, *J*=7.0 Hz, 1H), 7.72 (d, *J*=8.0 Hz, 1H), 7.60 (d, *J*=8.8 Hz, 2H), 7.52 (t, *J*=7.0 Hz, 1H); <sup>13</sup>C

NMR (DMSO- $d_6$ , 100 MHz):  $\delta$  = 163.5, 147.7, 140.6, 133.4, 128.8, 128.3, 127.4, 117.3, 114.9, 114.5; HRMS (ESI): calcd for  $[C_{14}H_9ClN_2O^+ + Na^+]$  279.0296, found 279.0303.

**2-(pyridin-2-yl)quinazolin-4(3H)-one (3ca)**<sup>3</sup>: Yellow solid, m.p. 165-170 °C; <sup>1</sup>H NMR (DMSO- $d_6$ , 400 MHz):  $\delta$  = 11.79 (br, s, 1H), 8.75-8.72 (m, 1H), 8.46-8.41 (m, 1H), 8.19-8.15 (m, 1H), 8.09-8.02 (m, 1H), 7.89-7.76 (m, 2H), 7.66-7.61 (m, 1H), 7.58-7.52 (m, 1H); <sup>13</sup>C NMR (CDCl<sub>3</sub>, 100 MHz):  $\delta$  = 160.3, 149.1, 148.8, 148.1, 147.6, 137.6, 135.0, 133.1, 129.6, 126.4, 126.2, 123.5, 122.0; HRMS (ESI): calcd for  $[C_{13}H_9N_3O^+ + Na^+]$  223.0746, found 223.0752.

**(E)-2-styrylquinazolin-4(3H)-one (3da)**<sup>2</sup>: Colourless solid, m.p. 224-227 °C; <sup>1</sup>H NMR (DMSO- $d_6$ , 400 MHz):  $\delta$  = 12.31 (br, s, 1H), 8.09 (d,  $J$  = 7.8 Hz, 1H), 7.92 (d,  $J$  = 16.3 Hz, 1H), 7.77 (t,  $J$  = 7.04 Hz, 1H), 7.70-7.64 (m, 3H), 7.51-7.36 (m, 4H), 6.98 (d,  $J$  = 15.2 Hz, 1H); <sup>13</sup>C NMR (DMSO- $d_6$ , 100 MHz):  $\delta$  = 161.8, 159.9, 151.4, 149.0, 138.3, 135.0, 129.8, 129.1, 127.7, 126.3, 125.9, 121.1; HRMS (ESI): calcd for  $[C_{16}H_{12}N_2O^+ + Na^+]$  271.0842, found 271.0853.

**6-chloro-2-phenylquinazolin-4(3H)-one (3ab)**<sup>4</sup>: m.p. 294-296 °C; <sup>1</sup>H NMR (DMSO- $d_6$ , 400 MHz):  $\delta$  = 12.69 (br, s, 1H), 8.17-8.15 (m, 2H), 8.08 (s, 1H), 7.87-7.85 (m, 1H), 7.78-7.76 (m, 1H), 7.64-7.51 (m, 3H); HRMS (ESI): calcd for  $[C_{14}H_9ClN_2O^+ + Na^+]$  279.0296, found 279.0302.

**2-(2-nitrophenyl)quinazolin-4(3H)-one (3ea)**: Pale Yellow Solid, 230-240 °C; <sup>1</sup>H NMR (DMSO- $d_6$ , 400 MHz):  $\delta$  = 12.81 (br, s, 1H), 8.19 (d,  $J$  = 8.28 Hz, 1H), 8.16 (d,  $J$  = 7.28 Hz, 1H), 7.92-7.80 (m, 4H), 7.63 (d,  $J$  = 8.04 Hz, 1H), 7.55 (t,  $J$  = 7.2 Hz, 1H); <sup>13</sup>C NMR (DMSO- $d_6$ , 100 MHz):  $\delta$  = 161.5, 151.6, 148.5, 147.4, 134.7, 133.9, 131.5, 129.1, 127.4, 127.1, 125.9, 124.5, 121.2; HRMS (ESI): calcd for  $[C_{14}H_9N_3O_3^+ + Na^+]$  290.0536, found 290.0540.

**2-pentylquinazolin-4(3H)-one (3fa)**<sup>2</sup>: Colourless solid, m.p. 152-154 °C; <sup>1</sup>H NMR (CDCl<sub>3</sub>, 400 MHz):  $\delta$  = 12.28 (br, s, 1H), 8.27 (d,  $J$  = 6.86 Hz, 1H), 7.77-7.75 (m, 1H), 7.68 (d,  $J$  = 7.45 Hz, 1H), 7.45 (t,  $J$  = 7.62 Hz, 1H), 2.80 (t,  $J$  = 7.76 Hz, 2H), 1.92-1.87 (m, 2H), 1.46-1.39 (m, 4H), 0.92 (t,  $J$  = 7.76 Hz, 3H); <sup>13</sup>C NMR (CDCl<sub>3</sub>, 100 MHz):  $\delta$  = 165.5, 158.2, 150.6, 135.2, 128.3, 127.8, 127.2, 121.1, 36.6, 31.9, 28.1, 22.8, 14.2; HRMS (ESI): calcd for  $[C_{13}H_{16}N_2O^+ + Na^+]$  239.1155, found 239.1167.

**2-hexylquinazolin-4(3H)-one (3ga)**<sup>5</sup>: Colourless solid, m.p. 140-145 °C; <sup>1</sup>H NMR (CDCl<sub>3</sub>, 400 MHz):  $\delta$  12.47 (br, s, 1H), 8.32 (d,  $J$  = 8.27 Hz, 1H), 7.78-7.75 (m, 1H), 7.75 (d,  $J$  = 8.32 Hz,

1H), 7.46-7.47 (m, 1H), 2.80 (t,  $J = 7.62$  Hz, 2H), 1.90-1.87 (m, 2H), 1.47-1.45 (m, 2H), 1.37-1.30 (m, 4H), 0.88 (t,  $J = 6.90$  Hz, 3H);  $^{13}\text{C}$  NMR ( $\text{CDCl}_3$ , 100 MHz):  $\delta$  165.3, 156.1, 149.3, 134.5, 127.4, 126.2, 126.7, 120.1, 35.8, 31.4, 28.6, 27.4, 22.4, 14.0; HRMS (ESI): calcd for  $[\text{C}_{14}\text{H}_{18}\text{N}_2\text{O}^{++} \text{Na}^+]$  253.1311, found 253.1319.

**2-(4-bromophenyl)quinazolin-4(3H)-one (3ha)**<sup>2</sup>: Colourless solid, m.p. 290-292 °C;  $^1\text{H}$  NMR ( $\text{DMSO-d}_6$ , 400 MHz):  $\delta = 12.59$  (br, s, 1H), 8.15-8.10 (m, 3H), 7.82 (t,  $J = 7.04$  Hz, 1H), 7.76-7.72 (m, 3H), 7.51 (t,  $J = 7.04$  Hz, 1H);  $^{13}\text{C}$  NMR ( $\text{DMSO-d}_6$ , 100 MHz):  $\delta = 159.7$ , 151.4, 148.2, 134.6, 131.6, 129.7, 127.5, 126.7, 125.8, 125.2, 121.0; HRMS (ESI): calcd for  $[\text{C}_{14}\text{H}_9\text{BrN}_2\text{O}^{++} \text{Na}^+]$  322.9790, found 322.9798.

**2-(*p*-tolyl)quinazolin-4(3H)-one (3ia)**<sup>1</sup>: Colourless solid, m.p. 230-232 °C;  $^1\text{H}$  NMR ( $\text{CDCl}_3$ , 400 MHz):  $\delta = 11.40$  (br, s, 1H), 8.30 (d,  $J = 7.52$  Hz, 1H), 8.10 (d,  $J = 8.28$  Hz, 2H), 7.82-7.76 (m, 2H), 7.46 (t,  $J = 7.76$  Hz, 1H), 7.35 (d,  $J = 8.0$  Hz, 2H);  $^{13}\text{C}$  NMR ( $\text{CDCl}_3$ , 100 MHz):  $\delta = 164.1$ , 151.7, 149.6, 142.1, 134.8, 130.1, 129.9, 129.7, 129.0, 127.8, 127.3, 126.5, 126.3, 120.6, 21.5; HRMS (ESI): calcd for  $[\text{C}_{15}\text{H}_{12}\text{N}_2\text{O}^{++} \text{Na}^+]$  259.0842, found 259.0848.

**2-(4-methoxyphenyl)quinazolin-4(3H)-one (3ja)**<sup>1</sup>: Colourless solid, m.p. 230-233 °C;  $^1\text{H}$  NMR ( $\text{CDCl}_3$ , 400 MHz):  $\delta = 10.80$  (br, s, 1H), 8.28 (d,  $J = 7.52$  Hz, 1H), 8.12 (d,  $J = 8.0$  Hz, 2H), 7.78 (m, 2H), 7.46 (m, 1H), 7.05 (d,  $J = 8.04$  Hz, 2H), 3.90 (s, 3H); HRMS (ESI): calcd for  $[\text{C}_{15}\text{H}_{12}\text{N}_2\text{O}_2^{++} \text{Na}^+]$  275.0791, found 275.0798.

**2-(furan-2-yl)quinazolin-4(3H)-one (3la)**<sup>2</sup>: Colourless solid, m.p. 272-275 °C;  $^1\text{H}$  NMR ( $\text{DMSO-d}_6$ , 400 MHz):  $\delta = 12.48$  (br, s, 1H), 8.10 (d,  $J = 8.04$  Hz, 1H), 7.99 (m, 1H), 7.78 (t,  $J = 8.52$  Hz, 1H), 7.66 (d,  $J = 8.0$  Hz, 1H), 7.61 (d,  $J = 3.52$  Hz, 1H), 7.46 (t,  $J = 7.04$  Hz, 1H), 6.74-6.73 (m, 1H);  $^{13}\text{C}$  NMR ( $\text{DMSO-d}_6$ , 100 MHz):  $\delta = 161.5$ , 148.6, 146.5, 146.0, 144.0, 134.6, 127.2, 126.4, 125.9, 121.1, 114.5, 112.5; HRMS (ESI): calcd for  $[\text{C}_{12}\text{H}_8\text{N}_2\text{O}_2^{++} \text{Na}^+]$  235.0478, found 235.0479.

**2-(thiophen-2-yl)quinazolin-4(3H)-one (3ma)**<sup>2</sup>: Colourless solid, m.p. 220-222 °C;  $^1\text{H}$  NMR ( $\text{DMSO-d}_6$ , 400 MHz):  $\delta = 12.63$  (br, s, 1H), 8.21 (d,  $J = 4.76$  Hz, 1H), 8.10 (d,  $J = 7.8$  Hz, 1H), 7.85 (d,  $J = 5.76$  Hz, 1H), 7.77 (t,  $J = 8.52$  Hz, 1H), 7.63 (d,  $J = 8.0$  Hz, 1H), 7.45 (t,  $J = 8.04$  Hz, 1H), 7.23-7.21 (m, 1H);  $^{13}\text{C}$  NMR ( $\text{DMSO-d}_6$ , 100 MHz):  $\delta = 161.8$ , 148.6, 147.8, 137.3, 134.7,

132.1, 129.4, 128.5, 126.9, 126.3, 125.9, 120.8; HRMS (ESI): calcd for [C<sub>12</sub>H<sub>8</sub>N<sub>2</sub>OS<sup>+</sup>+ Na<sup>+</sup>] 251.0250, found 251.0252.

**2-phenyl-2,3-dihydroquinazolin-4(1H)-one (A)<sup>6</sup>:** Colourless crystal, m.p. 215-220 °C; <sup>1</sup>H NMR (400 MHz, CDCl<sub>3</sub>): δ 7.94 (d, *J* = 7.76 Hz, 1H), 7.60 (m, 2H), 7.44 (m, 3H), 7.33 (t, *J* = 7.52 Hz, 1H), 6.90 (t, *J* = 7.76 Hz, 1H), 6.67 (d, *J* = 8.04 Hz, 1H), 5.90 (s, 1H), 5.88 (br, 1H, NH), 4.35 (br, 1H, NH), <sup>13</sup>C NMR (100 MHz, DMSO-*d*<sub>6</sub>): δ 164.0, 148.3, 142.1, 133.8, 128.9, 128.8, 127.8, 127.3, 117.6, 115.4, 114.8, 67.0; HRMS (ESI): calcd for [C<sub>14</sub>H<sub>12</sub>N<sub>2</sub>O + Na<sup>+</sup>] 247.0842, found 247.0864.

## References:

1. Hikawa, H.; Ino, Y.; Suzuki, H.; Yokoyama, Y. *J. Org. Chem.* **2012**, *77*, 7046.
2. Upadhyaya, K.; Thakur, R. K.; Shukla, S. K.; Tripathi, R. P. *J. Org. Chem.* **2016**, *81*, 5046.
3. Siddiki, S. M. A. H.; Kon, K. A.; Touchy, S.; Shimizu, K. *Catal. Sci. Technol.* **2014**, *4*, 1716.
4. Zhou, J.; Fang, J. *J. Org. Chem.* **2011**, *76*, 7730.
5. Sharif, M.; Opalach, J.; Langer, P.; Beller, M.; Wu, X.-F. *RSC Adv.* **2014**, *4*, 8.
6. Majumdar, B.; Mandani, S.; Bhattacharya, T.; Sarma, D.; Sarma, T. K. *J. Org. Chem.* **2017**, *82*, 2097.

## <sup>1</sup>H and <sup>13</sup>C NMR Spectra of Quinazolinones

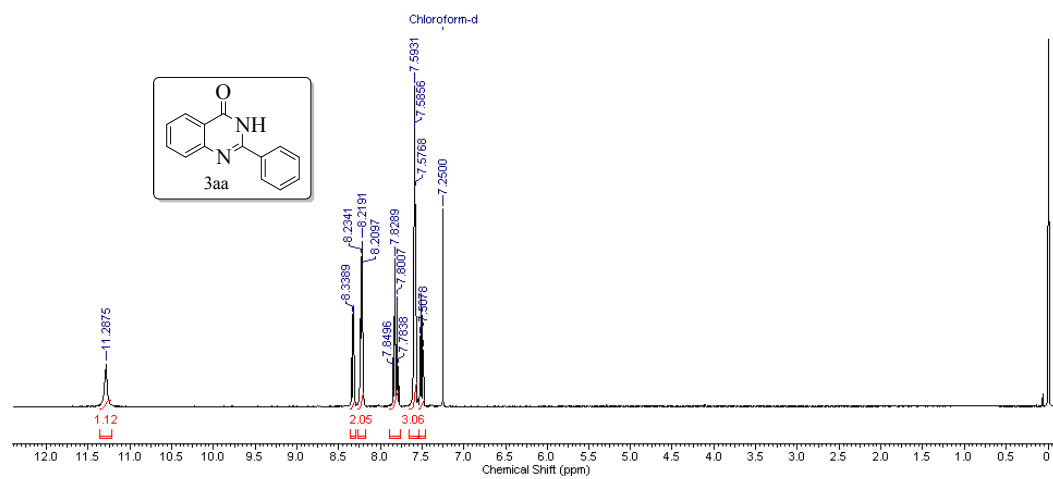

Figure S2: <sup>1</sup>H NMR of 3aa

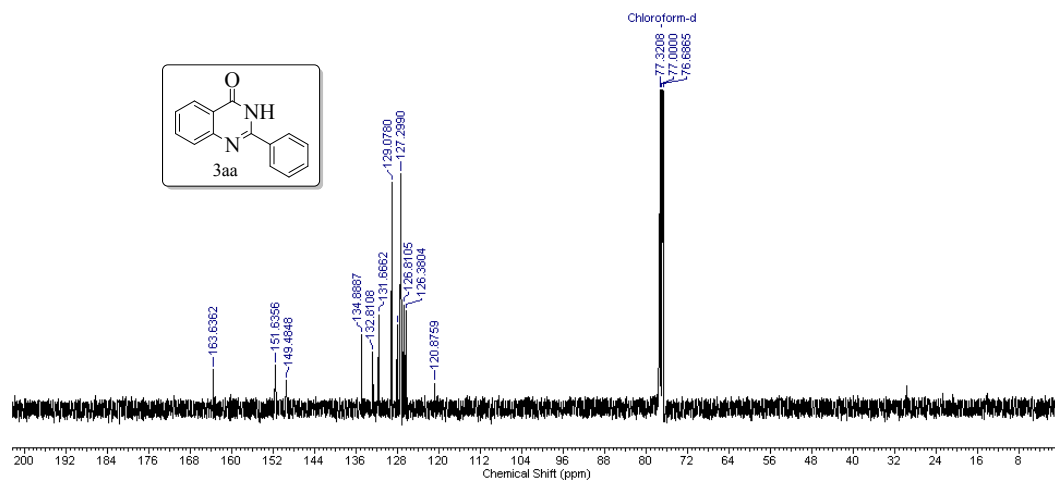

Figure S3:  $^{13}\text{C}$  NMR of 3aa

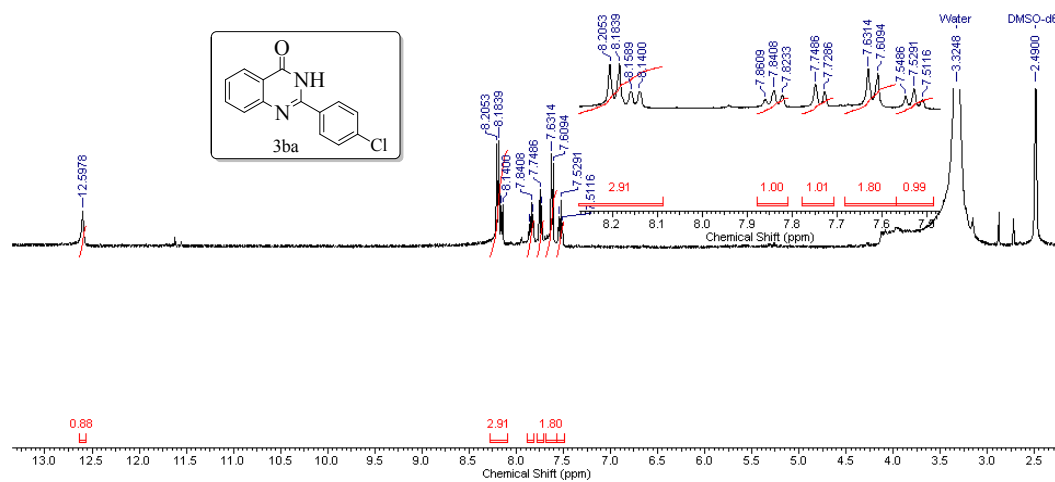

Figure S4:  $^1\text{H}$  NMR of 3ba



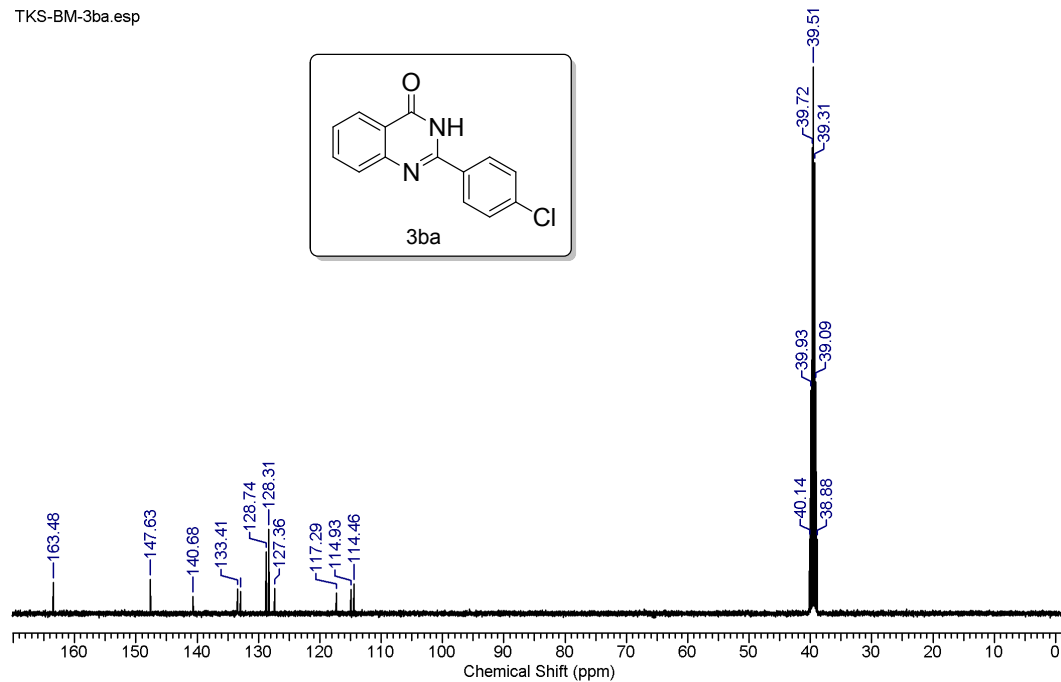Figure S5: <sup>13</sup>C NMR of 3ba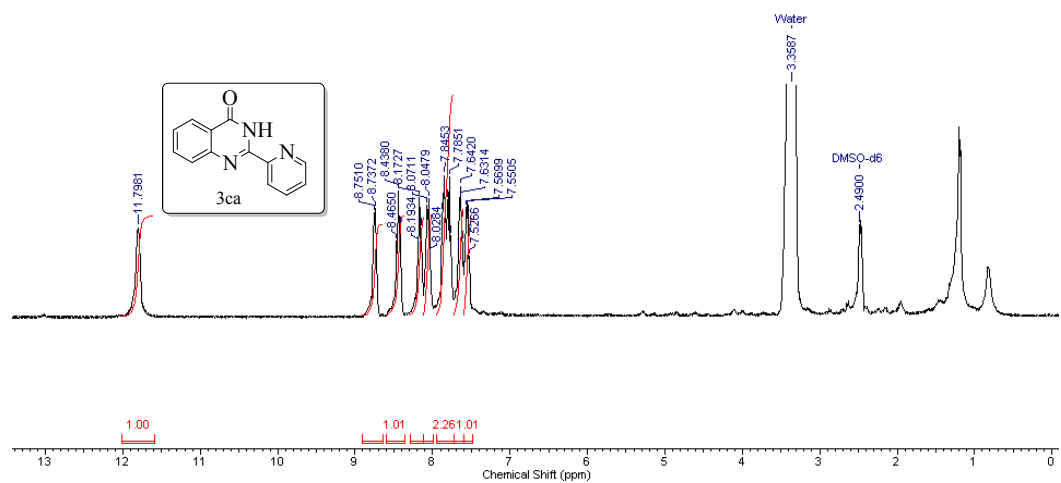Figure S6: <sup>1</sup>H NMR of 3ca

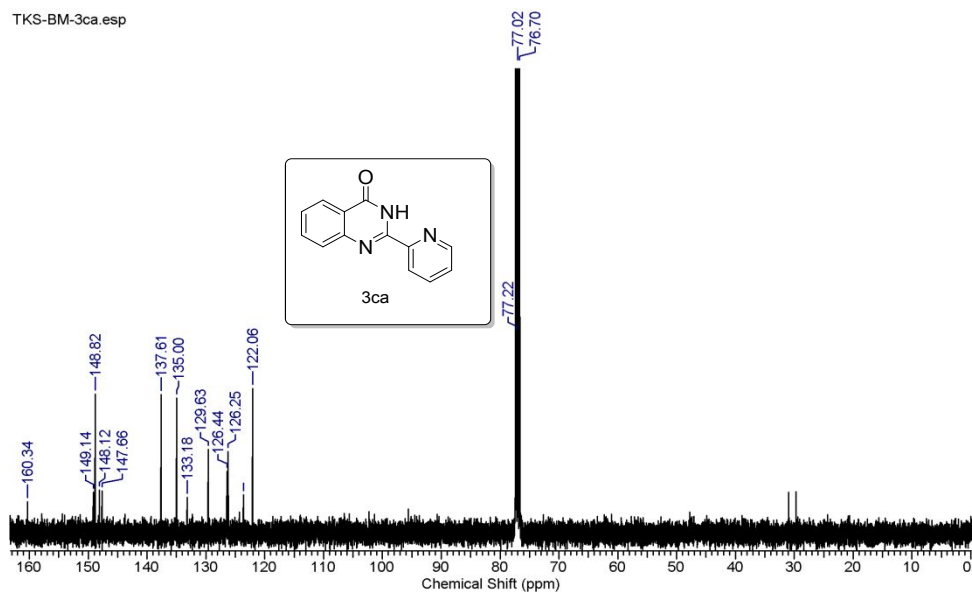

Figure S7:  $^{13}\text{C}$  NMR of 3ca

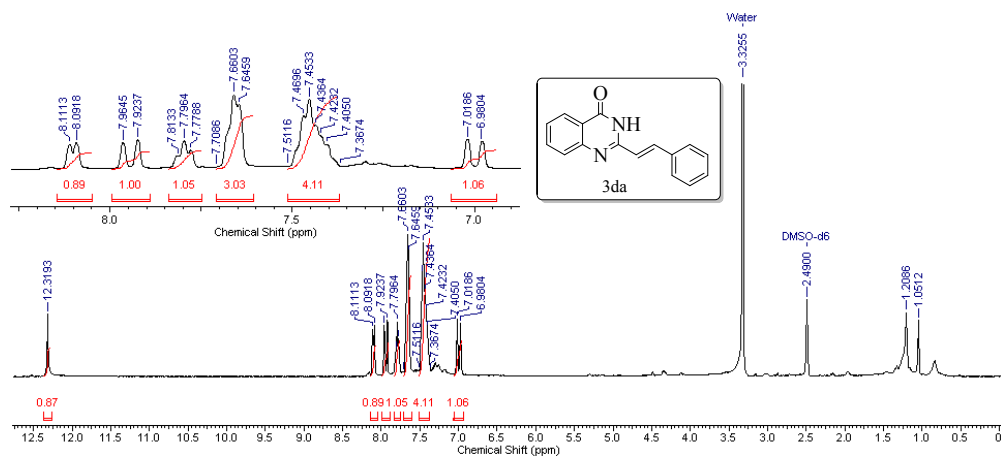

Figure S8:  $^1\text{H}$  NMR of 3da

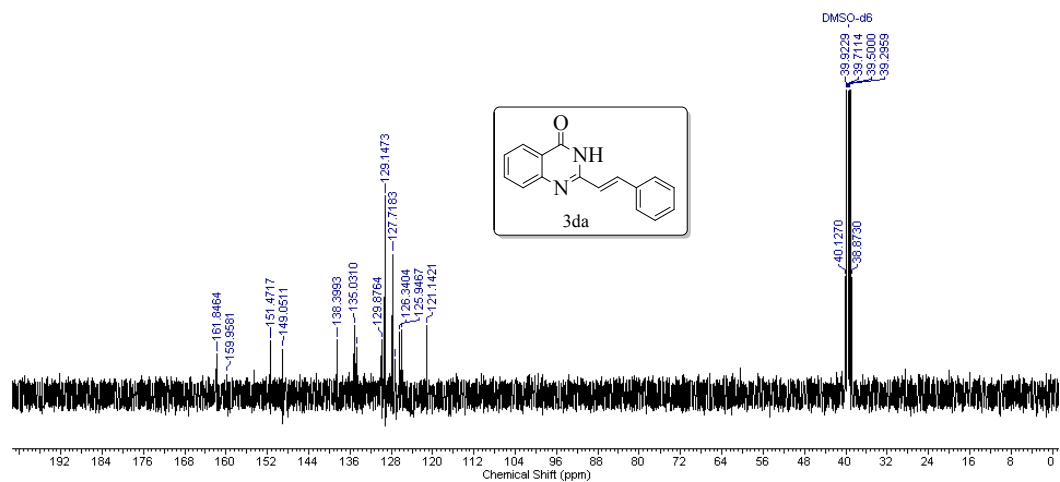

Figure S9:  $^{13}\text{C}$  NMR of 3da

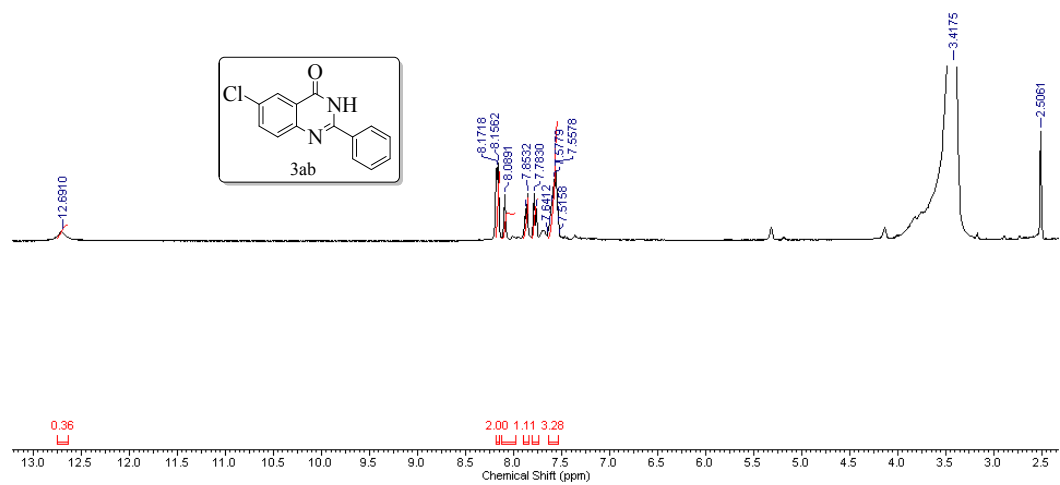

Figure S10:  $^1\text{H}$  NMR of 3ab

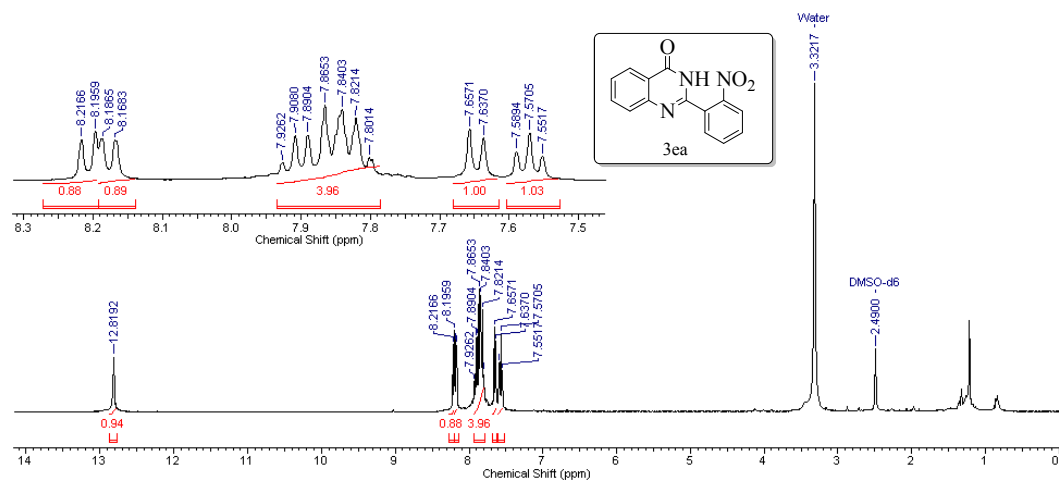

Figure S11: <sup>1</sup>H NMR of 3ea

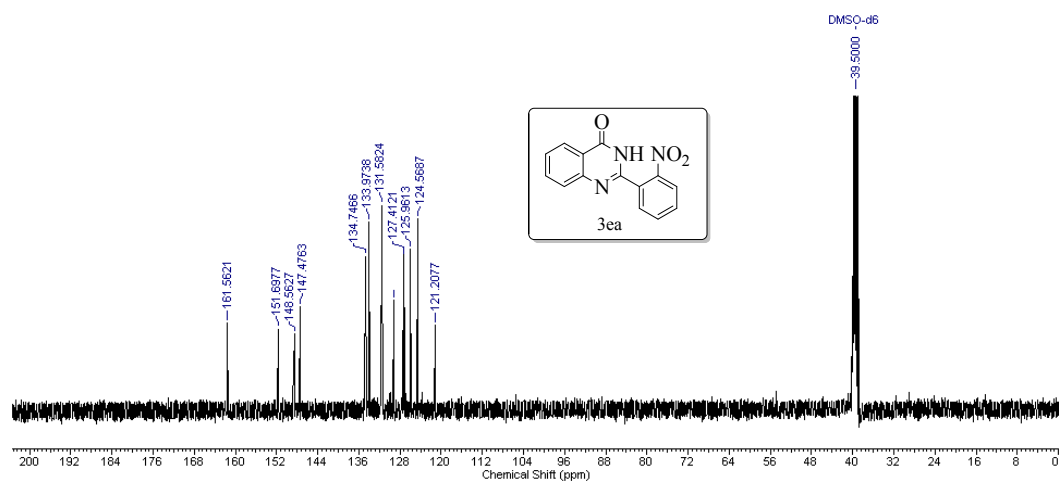

Figure S12: <sup>13</sup>C NMR of 3ea

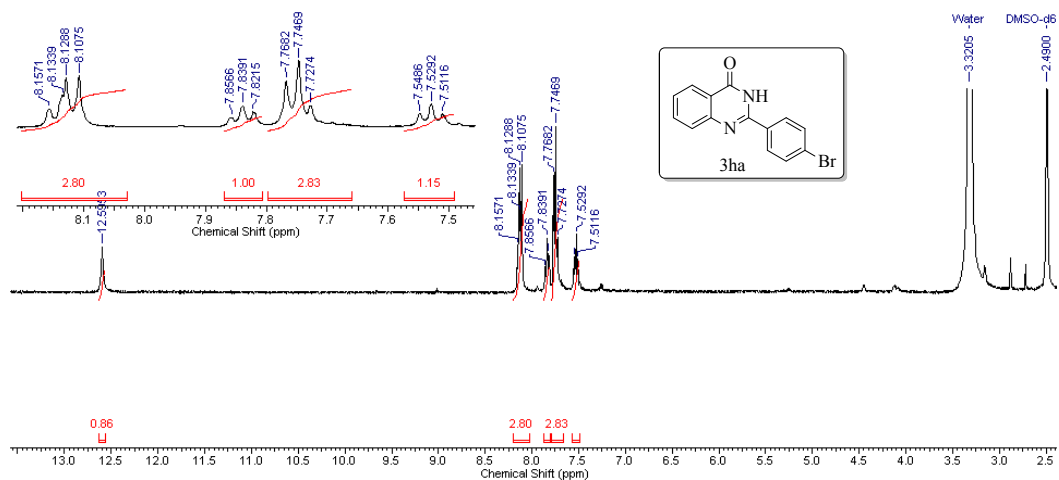

Figure S13:  $^1\text{H}$  NMR of 3ha

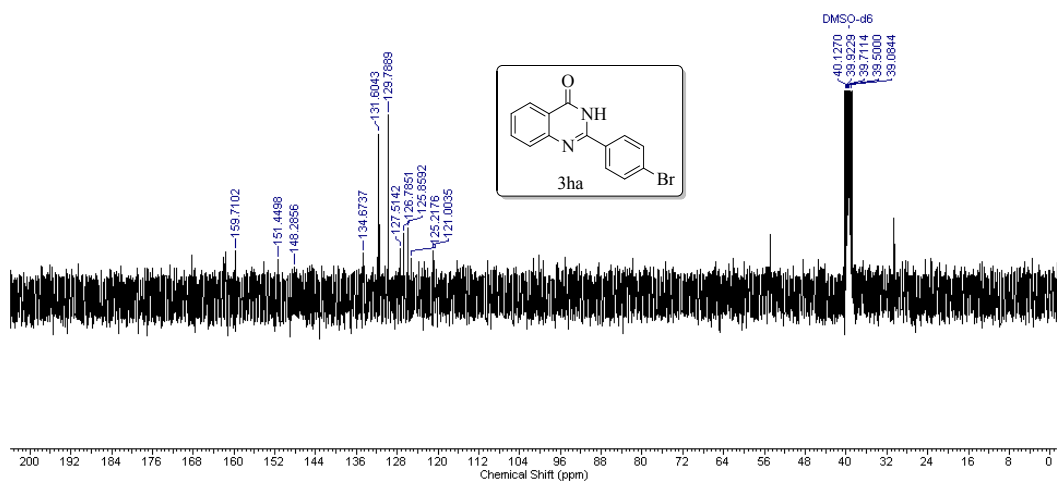

Figure S14:  $^{13}\text{C}$  NMR of 3ha

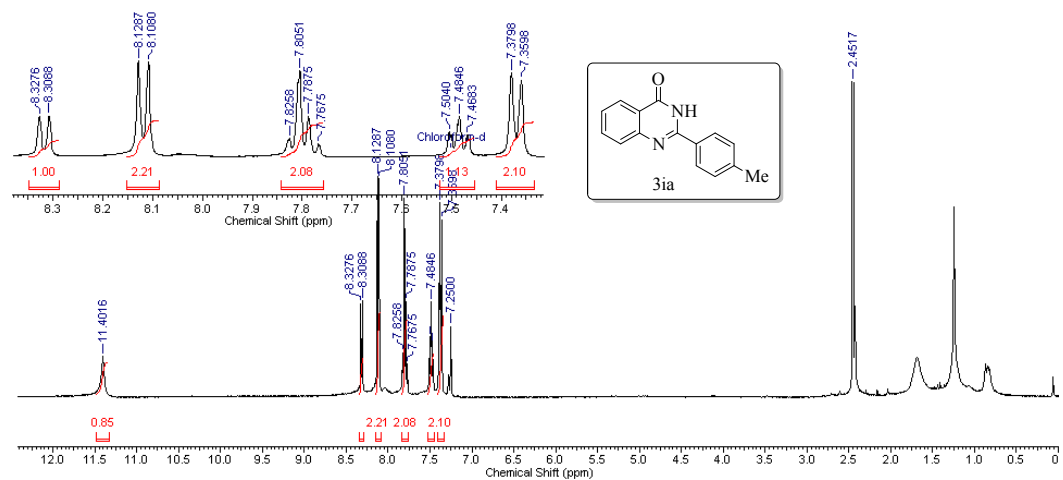

Figure S15:  $^1\text{H}$  NMR of 3ia

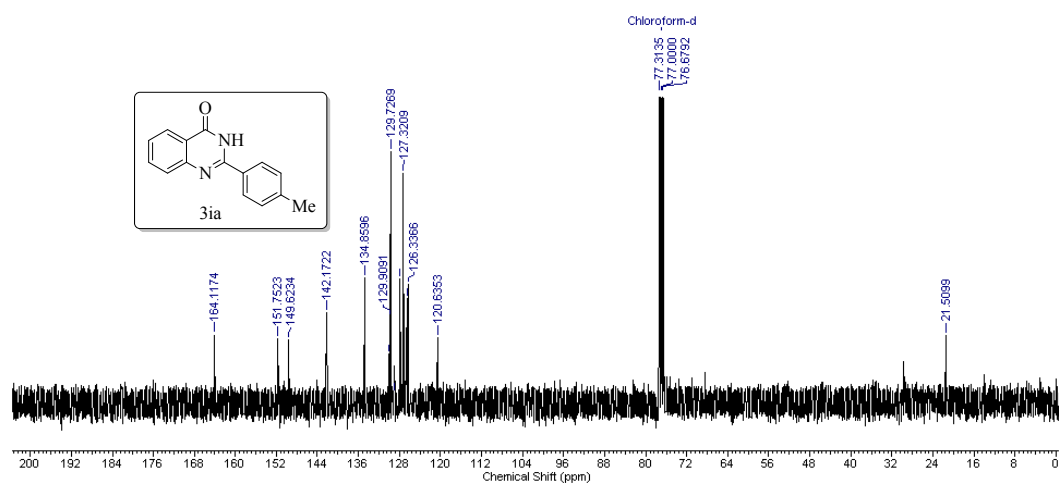

Figure S16:  $^{13}\text{C}$  NMR of 3ia

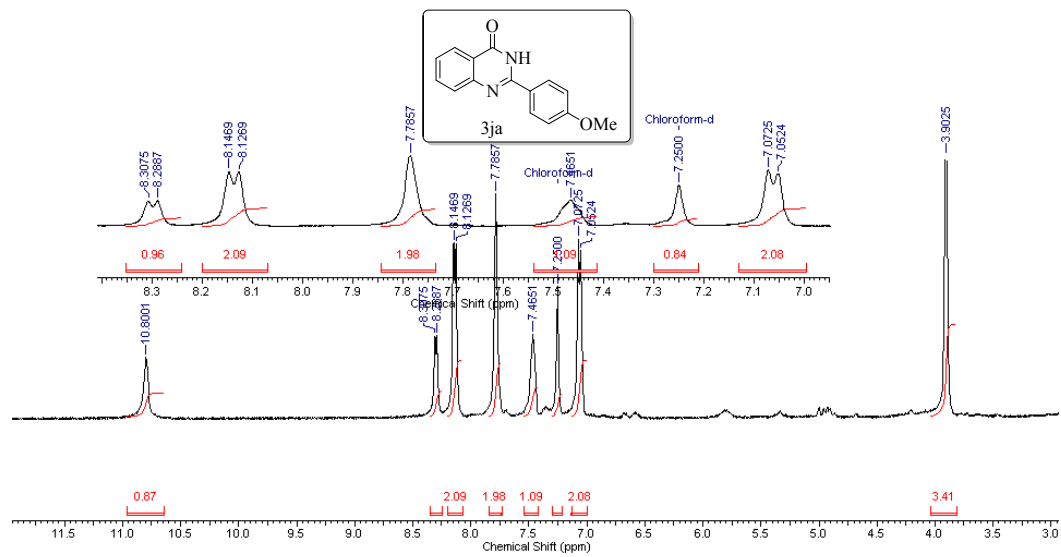

Figure S17:  $^1\text{H}$  NMR of 3ja

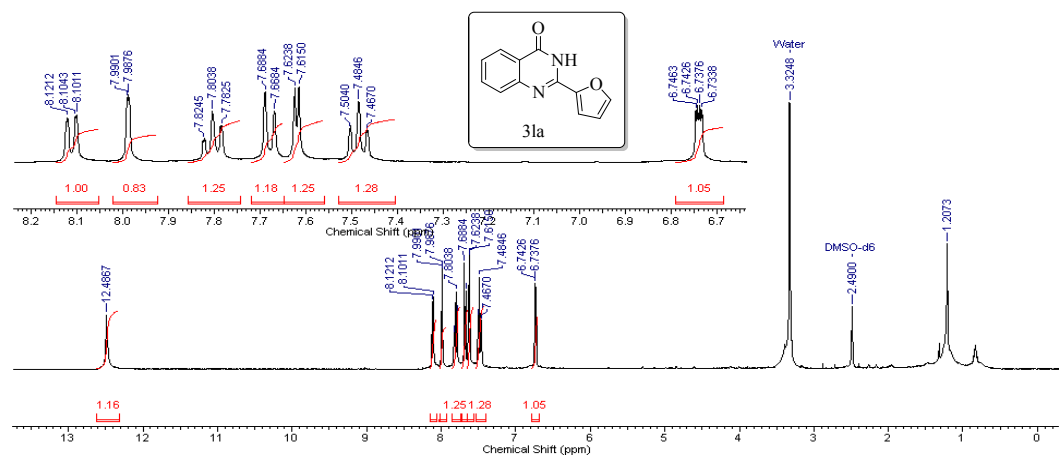

Figure S18:  $^1\text{H}$  NMR of 3la

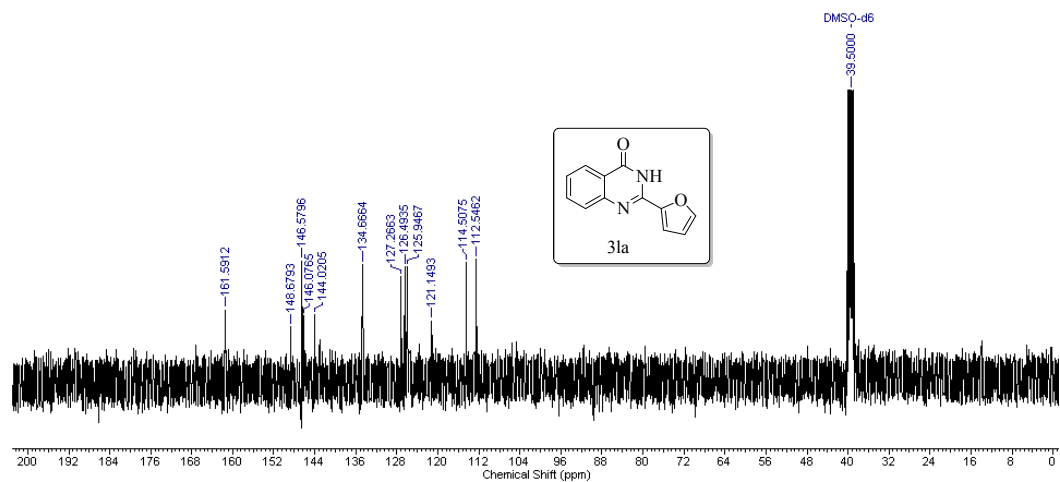

Figure S19:  $^{13}\text{C}$  NMR of 3la

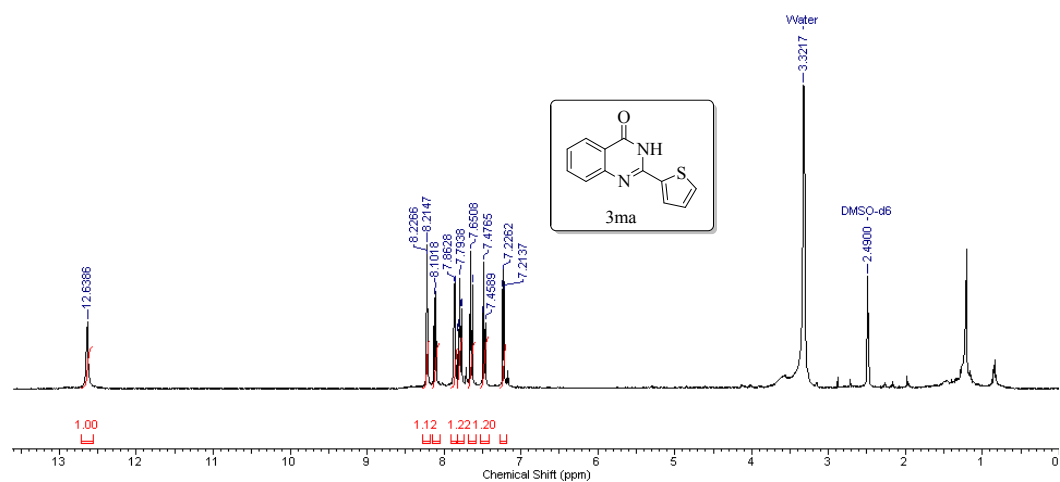

Figure S20:  $^1\text{H}$  NMR of 3ma



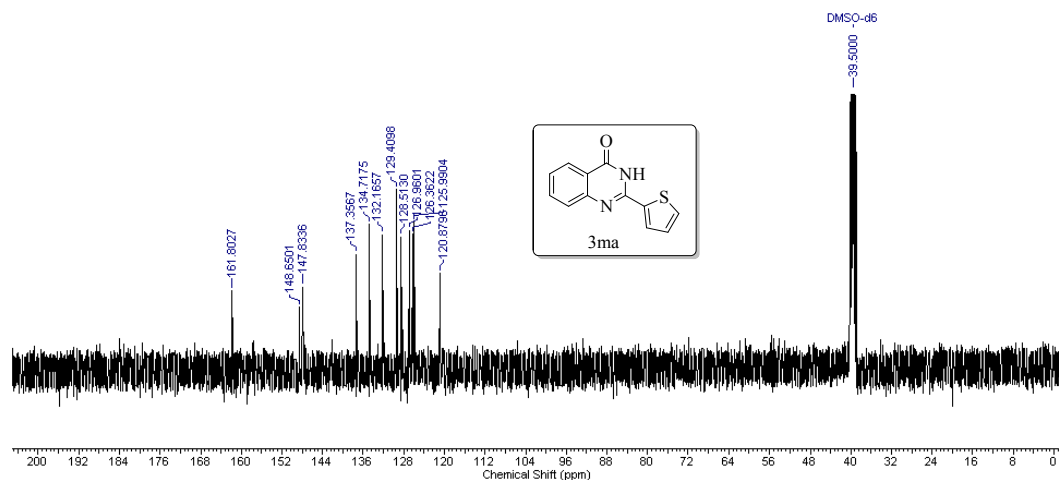

Figure S21:  $^{13}\text{C}$  NMR of 3ma

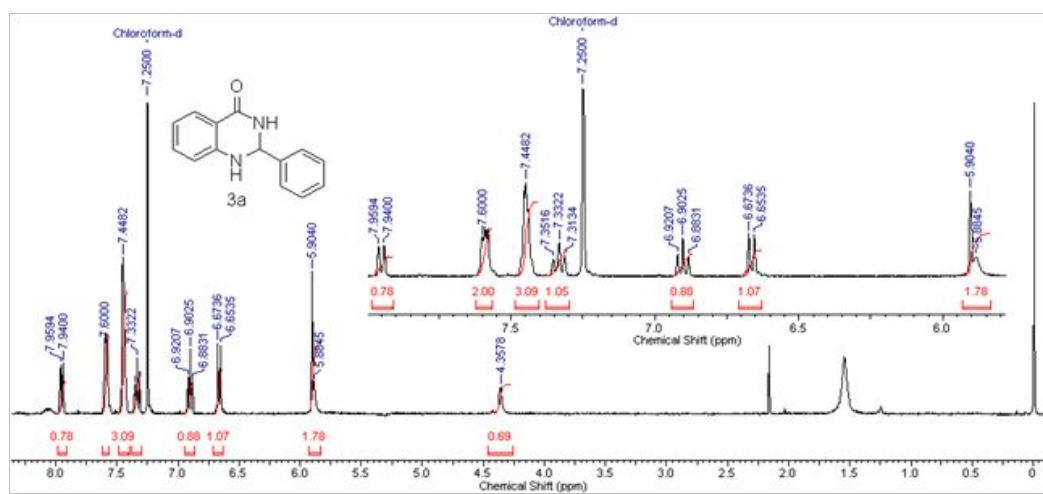

Figure S22:  $^1\text{H}$  NMR of A

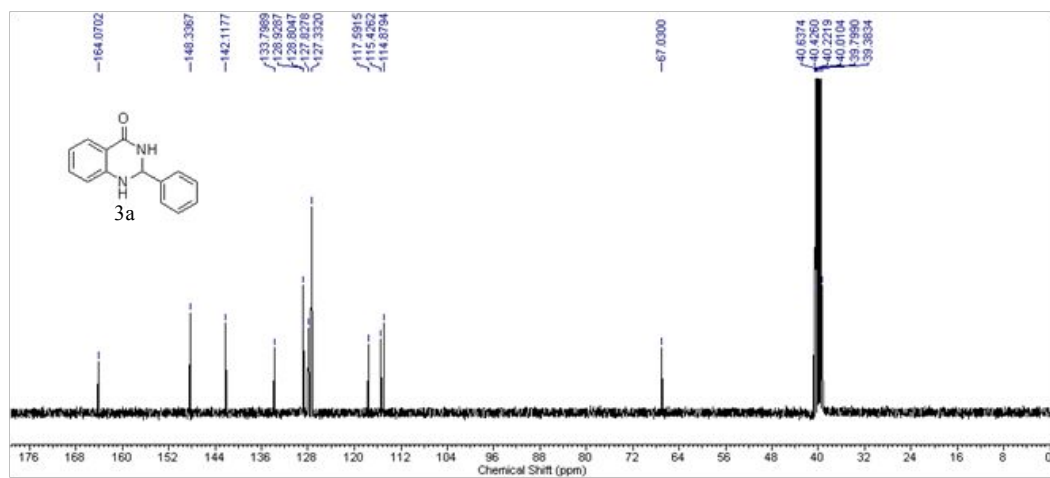

Figure S23:  $^{13}\text{C}$  NMR of A
